# Supplementary material
Source: PubMed Central journal article supplement (PMC9222071)
Supplement: NIHMS1813156-supplement-SI_pdf.pdf [file NIHMS1813156-supplement-SI_pdf.pdf]

## Supporting Information: Frugal Science powered by curiosity

Gaurav Byagathvalli <sup>1‡</sup>, Elio J. Challita <sup>2‡</sup>, and M. Saad Bhamla <sup>1\*</sup>

1. School of Chemical and Biomolecular Engineering, Georgia Institute of Technology, Atlanta, GA 30332
2. Mechanical Engineering, Georgia Institute of Technology, Atlanta, GA, 30311, USA

| Technology Name                | Frugal Version | Commercial Version | References |
|--------------------------------|----------------|--------------------|------------|
| <b>ElectroPen/ePatch</b>       | \$0.23-1.00    | >\$2,000           | 1-2        |
| <b>Paperfuge</b>               | \$0.20-1.00    | >\$700             | 3-4        |
| <b>Paper-based diagnostics</b> | \$0.01-0.50    | >\$10              | 5-7        |
| <b>Foldscope</b>               | \$0.58-2.00    | >\$500             | 8          |
| <b>Triboelectric X-ray</b>     | \$5.00-10.00   | >\$125,000         | 9-10       |
| <b>Bubble Wrap Assay</b>       | \$0.01-0.20    | \$0.60             | 11         |

**Table S1.** Summary of cost comparisons between frugal science tools and comparable commercial devices.

### References

1. Byagathvalli, G., Sinha, S., Zhang, Y., Styczynski, M. P., Standeven, J., & Bhamla, M. S. (2020). ElectroPen: An ultra-low-cost, electricity-free, portable electroporator. *PLoS biology*, *18*(1), e3000589.
2. Xia et al. (2021) An ultralow-cost electroporator with microneedle electrodes (ePatch) for SARS-CoV-2 vaccination.
3. Bhamla, M. S., Benson, B., Chai, C., Katsikis, G., Johri, A., & Prakash, M. (2017). Hand-powered ultralow-cost paper centrifuge. *Nature Biomedical Engineering*, *1*(1), 1-7.
4. Byagathvalli, G., Pomerantz, A., Sinha, S., Standeven, J., & Bhamla, M. S. (2019). A 3D-printed hand-powered centrifuge for molecular biology. *PLoS biology*, *17*(5), e3000251.
5. King, R. (2020, June 10). *Study: Annual costs for diagnostic tests up to \$25B, antibody tests up to \$19B*. FierceHealthcare. Retrieved September 28, 2021, from <https://www.fiercehealthcare.com/payer/study-annual-costs-for-diagnostic-tests-up-to-25b-and-antibody-tests-up-to-19b>.
6. *Outpatient Lab, Diagnostic and other ancillary charges for healthcare services*. Lee Health. (n.d.). Retrieved September 28, 2021, from <https://www.leehealth.org/billing/estimates-costs/how-much-do-procedures-cost/outpatient-lab-diagnostic-and-other-ancillary-charges-for-healthcare-services>.
7. Martinez, A. W., Phillips, S. T., Whitesides, G. M., & Carrilho, E. (2010). Diagnostics for the developing world: microfluidic paper-based analytical devices.

8. Cybulski, J. S., Clements, J., & Prakash, M. (2014). Foldscope: origami-based paper microscope. *PloS one*, *9*(6), e98781.
9. Lori Webb & Webb, L. (n.d.). *Purchasing insight: Portable X-ray*. Healthcare Finance News. Retrieved September 28, 2021, from <https://www.healthcarefinancenews.com/blog/purchasing-insight-portable-x-ray#:~:text=Hospitals%20with%20an%20existing%20analog,and%20type%20of%20detector%20selected>.
10. Hird, J. R., Camara, C. G., & Putterman, S. J. (2011). A triboelectric x-ray source. *Applied Physics Letters*, *98*(13), 133501.
11. Bwambok, D. K., Christodouleas, D. C., Morin, S. A., Lange, H., Phillips, S. T., & Whitesides, G. M. (2014). Adaptive use of bubble wrap for storing liquid samples and performing analytical assays. *Analytical chemistry*, *86*(15), 7478-7485.
